# Supplementary material
Source: PubMed Central journal article supplement (PMC3911173)

**Table S1: Plasmids**

| Plasmid  | Genotype                                                         |                                             |
|----------|------------------------------------------------------------------|---------------------------------------------|
| pAH25    | <i>amyE::spec amp</i>                                            | (gift from Amy Camp, Mount Holyoke College) |
| pAH54    | <i>spec amp</i>                                                  | (gift from Amy Camp, Mount Holyoke College) |
| pMarA    | <i>TnYLB-1 amp mls ori<sup>BsTs</sup></i>                        | (Le Breton <i>et al.</i> , 2006)            |
| pMiniMAD | <i>ori<sup>BsTs</sup> amp mls</i>                                | (Patrick & Kearns, 2008)                    |
| pDG1515  | <i>tet amp</i>                                                   | (Guérout-Fleury <i>et al.</i> , 1995)       |
| pDG268   | <i>amyE::lacZ cat amp</i>                                        | (Antoniewski <i>et al.</i> , 1990)          |
| pDP374   | $\Omega\Delta$ <i>fliT mls amp</i>                               |                                             |
| pDR111   | <i>amyE::P<sub>hyspank</sub> spec amp</i>                        | (Ben Yehuda <i>et al.</i> , 2003)           |
| pEX44    | <i>lacZ cat amp</i>                                              | (gift from Patrick Eichenberger, NYU)       |
| pEC1     | $\Omega\Delta$ <i>motA mls amp</i>                               |                                             |
| pEC6     | <i>amyE::P<sub>motA</sub>-motA motB spec amp</i>                 |                                             |
| pEC7     | <i>amyE::P<sub>motA</sub>-motA motB<sup>D24N</sup> spec amp</i>  |                                             |
| pEC8     | <i>amyE::P<sub>motA</sub>-motA motB<sup>D24E</sup> spec amp</i>  |                                             |
| pEC10    | <i>amyE::P<sub>hyspank</sub>-motA motB spec amp</i>              |                                             |
| pEC12    | <i>pgsE<math>\Omega</math>lacZ cat amp</i>                       |                                             |
| pEC13    | $\Omega\Delta$ <i>mfd mls amp</i>                                |                                             |
| pEC14    | $\Omega\Delta$ <i>comQ mls amp</i>                               |                                             |
| pEC15    | $\Omega\Delta$ <i>flgL mls amp</i>                               |                                             |
| pEC16    | <i>amyE::P<sub>motA</sub>-motA<sup>P155T</sup> motB spec amp</i> |                                             |
| pEC17    | <i>amyE::P<sub>motA</sub>-motA<sup>P155R</sup> motB spec amp</i> |                                             |
| pEC18    | <i>amyE::P<sub>motA</sub>-motA<sup>R90H</sup> motB spec amp</i>  |                                             |
| pEC19    | <i>amyE::P<sub>ywtD</sub>-lacZ cat amp</i>                       |                                             |
| pEC20    | <i>amyE::P<sub>hyspank</sub>-degQ spec amp</i>                   |                                             |
| pEC24    | <i>amyE::P<sub>motA</sub>-motA<sup>R90G</sup> motB spec amp</i>  |                                             |
| pEC25    | $\Omega\Delta$ <i>pgsB mls amp</i>                               |                                             |
| pEC27    | <i>amyE::P<sub>motA</sub>-motA<sup>P203R</sup> motB spec amp</i> |                                             |
| pEC30    | <i>amyE::P<sub>motA</sub>-motA<sup>P203T</sup> motB spec amp</i> |                                             |
| pEC32    | $\Omega\Delta$ <i>comX mls amp</i>                               |                                             |
| pEC33    | $\Omega\Delta$ <i>comP mls amp</i>                               |                                             |
| pMP196   | $\Omega\Delta$ <i>degS mls amp</i>                               |                                             |

**Table S2: Primers**

| Primer | Sequence                                            |
|--------|-----------------------------------------------------|
| 93     | ACCCGAATGTAAAACCGACAACGA                            |
| 94     | GAACAACCTGCACCATTGCAAGAAACAGGTGTAAGATAATCAAAACGTTT  |
| 95     | TTGATCCTTTTTTTATAACAGGAATTCAGGAAAATCGGCGTGTGGAAATAG |
| 96     | ACGGACGATTACATTCAGGCCGT                             |
| 695    | GCTTGTA AATTCTATCATAATTG                            |
| 696    | AGGGAATCATTGGAAGGTTGG                               |
| 822    | TGAACAAATTCACAATGTCCCTAAAG                          |
| 823    | TGCGTCAATCGAGCTGCTCGC                               |
| 1008   | TGCAGCCGCTGAAGAATATGGCA                             |
| 1535   | CGGCACTGATCCATTCTCCGTCA                             |
| 1536   | CAATTCGCCCTATAGTGAGTTCGTCGCCGCTTTTCACCTCCTCTGA      |
| 1537   | CCAGCTTTTGTTCCTTTAGTGAGGCGTTTACCCTCCCCCTTTTCTCT     |
| 1538   | GTGGCCCATGATCACCAGGCAA                              |
| 2401   | AGGAGGAATTCTTATCCGACTCGATATGAGCGAATA                |
| 2402   | CTCCTCTCGAGAATACCGATTAACGAAGTTTATCCAT               |
| 2403   | AGGAGCTCGAGAAGGACCGCTTGAAATTTGCAGAAC                |
| 2404   | CTCCTGGATCCGCATCGGTCTTTTGAACGATATTTTC               |
| 2465   | CTCCTCTCGAGTTTTTCATTTGTTTCCGCTGCGCC                 |
| 2471   | CTCCTGGATCCTTTGCTATTTTTCATTTGTTTCCGCTG              |
| 2472   | AGGAGGTCGACAACCATCCAAGAATGGGTTGAGGA                 |
| 2547   | AGGAGCTCGAGAACCCTTATAACAACATTACGAT                  |
| 2548   | CTCCTGGATCCGTCAAAATAGCGCTCCAGCT                     |
| 2571   | CGTTCCTTACGCCAACATCCTTACTCTTCTC                     |
| 2572   | GAGAAGAGTAAGGATGTTGGCGTAAGGAACG                     |
| 2623   | GGACAAGCACCGAAAGTCATCGA                             |
| 2630   | CGTTCCTTACGCCGAGATCCTTACTCTTC                       |
| 2631   | GAAGAGTAAGGATCTCGGCGTAAGGAACG                       |
| 2641   | AGGAGGAATTCAGAAGTACTGTGAAAAGTATTG                   |
| 2642   | CTCCTCTCGAGTGACAGCATACTCTTCGTCTC                    |
| 2773   | AGGAGGTCGACGATATTAACCATAGACAAGCTAGTAAA              |
| 2774   | CTCCTGTAGCCCTGATATGTCACAAGGCTTCCTT                  |
| 2811   | AGGAGGAATTCCATGCGGACATTGTTGTTGTGCAG                 |
| 2812   | CTCCTGGATCCGAATTATTTATTGGCGTTTACCGGTT               |
| 2840   | AGGAGGAATTCCACGGCATAATGTCGGATTTATGG                 |
| 2841   | CTCCTGGATCCAACCGTTGATGATGGATTTAAAGTCA               |
| 2842   | AGGAGGGATCCGCTGGGCATGCTGAAGGGCTTA                   |
| 2843   | CTCCTGTGACAATCCAGCTGCTGTTTCAACGGC                   |
| 2844   | AGGAGGAATTCGATCAGGCGCCTTATAGTTTGTTTA                |
| 2845   | CTCCTGGATCCTGAGTAAAGAAGTTGTGACAAATCCT               |
| 2846   | AGGAGGGATCCAGGAATGCTTATTAAGTTATACAAAGG              |
| 2847   | CTCCTGTGACATCAATATCTACTTGTAATAGTCTTGA               |
| 2848   | AGGAGGGTACCCTGTGTTGGATGTCAATTCTCTGC                 |
| 2849   | CTCCTGTGACCTGTATCATGCCTTGTGTTACTCTC                 |
| 2850   | AGGAGGTCGACACTCTGGCCGTTAATGCGCAAATT                 |
| 2851   | CTCCTGGATCCTATTCTACATCTATATTTAAATCAGGGT             |
| 2914   | CTCAGCTTGCACACCGCAAGGTCT                            |
| 2915   | AGACCTTCGCGGTGTGCAAGCTGAG                           |
| 2916   | GGAACGTACGCTCGGACACTTGGAGTAC                        |
| 2917   | GTACTCCAAGTGTCCGAGCGTACGTTCC                        |
| 2918   | CAGGAACGTACGCTACGACACTTGGAGT                        |
| 2919   | ACTCCAAGTGTGCTAGCGTACGTTCTCTG                       |
| 2955   | AGGAGGAATTCATATCCATGAAGCGACACCTGCG                  |

|      |                                             |
|------|---------------------------------------------|
| 2956 | CTCCTGGATCCCCTCTTTTTGCAGTTTTAACATCGG        |
| 2957 | AGGAGAAGCTTGTTACCATAACAATTCATTGATCT         |
| 2958 | CTCCTGCTAGCATCCATTTATTGTATCGGTAGAACGA       |
| 3001 | CTCCTCTCGAGGACAGCACAGGCTATAATGAGTAAC        |
| 3002 | AGGAGCTCGAGCTGCTATTGAGCGGAGCGACCT           |
| 3003 | CTCCTGAATTCGGTAAAGCCAAGCGTCGCAATCG          |
| 3008 | GGCTCAGCTTGCAGGCCGCGAAGGTCTG                |
| 3009 | CAGACCTTCGCGGCCTGCAAGCTGAGCC                |
| 3010 | CAGGGTATGTGTTATGGCATCGTTTTCGCAAATAAAATAAAAC |
| 3011 | GTTTTAATTTATTTGCGAAACGATGCCATAACACATACCCTG  |
| 3012 | CAGGGTATGTGTTATGGCATACTTTGCAAATAAAATAAA     |
| 3013 | TTTAATTTATTTGCGAAAGTATGCCATAACACATACCCTG    |
| 3043 | AGGAGGGATCCGACAAAGTCTTCACAAATATGGATGA       |
| 3126 | AGGAGGAATTCGATCTTGAAGATGAAGATAATCACCA       |
| 3127 | CTCCTCTCGAGTTAATTAGGTCTTGCATCTTGTATCC       |
| 3128 | AGGAGCTCGAGCTCAATGGGGTGATTAATAGGTG          |
| 3129 | CTCCTGGATCCAATACCAAGATTAAATATTGGTATGATAT    |
| 3130 | AGGAGGAATTCTCTGATTGCACTAGCAAATGTAGCA        |
| 3131 | CTCCTCTCGAGTATTAAGTCTTCAATATTAATCCACCT      |
| 3132 | AGGAGCTCGAGGCTGATATTGAAATCGAATTGTAATGG      |
| 3133 | CTCCTGGATCCGAAGAATCAGGCATTCTCTAGGTG         |
| 3899 | AGGAGGGATCCCACGTATGTTTCGAATTCAACAT          |
| 3900 | CTCCTGCGGCCCGCCTTTGTTTTATTTCATAATTTCCCTC    |
| 3901 | AGGAGGCCGCCGCGTTCCGTTATCTCTTTGACTATG        |
| 3902 | CTCCTGTGACACGGCTTGCCTCCGGTCGTTTACA          |

## SUPPLEMENTAL REFERENCES

**Antoniewski C, Savelli B, Stragier P.** 1990. The *spolIJ* gene, which regulates early developmental steps in *Bacillus subtilis*, belongs to a class of environmentally responsive genes. *J. Bacteriol.* **172**:86–93.

**Ben-Yehuda S, Rudner DZ, Losick R.** 2003. RacA, a bacterial protein that anchors chromosomes to cell poles. *Science* **299**:532-536.

**Guérout-Fleury AM, Shazand K, Frandsen N, Stragier P.** 1995. Antibiotic resistance cassettes for *Bacillus subtilis*. *Gene* **167**:335-336.

**Le Breton Y, Mohapatra NP, Haldenwang WG.** 2006. *In vivo* random mutagenesis of *Bacillus subtilis* by use of TnYLB-1, a mariner-based transposon. *Appl. Environ. Microbiol.* **72**:327–333.

**Patrick JE, Kearns DB.** 2008. MinJ (YvjD) is a topological determinant of cell division in *Bacillus subtilis*. *Mol. Microbiol.* **70**:1166-1179.

## SUPPLEMENTAL FIGURE LEGEND

**Figure Legend S1. MotA/MotB are required for swimming motility but MotP/MotS are not.** Swim plates of LB containing (+NaCl) or lacking (-NaCl) added NaCl and fortified with 0.3% agar were toothpick inoculated in the center of the plate and incubated at 37°C for 8 hours. Plates were filmed against a black background such that zones of colonization appear white and uncolonized agar appears black. Ancestral strain derivatives of *B. subtilis* readily swarm atop solid surfaces even surfaces solidified with 0.3% agar that normally supports swimming motility. To discourage swarming and encourage swimming motility, cells were mutated for surfactin synthesis (*urfAA*) and EPS biosynthesis (*epsH*). The following strains were used to generate this figure: wild type (DK1484), *motAB* (DK1492), and *motPS* (DK1493).

Figure S1

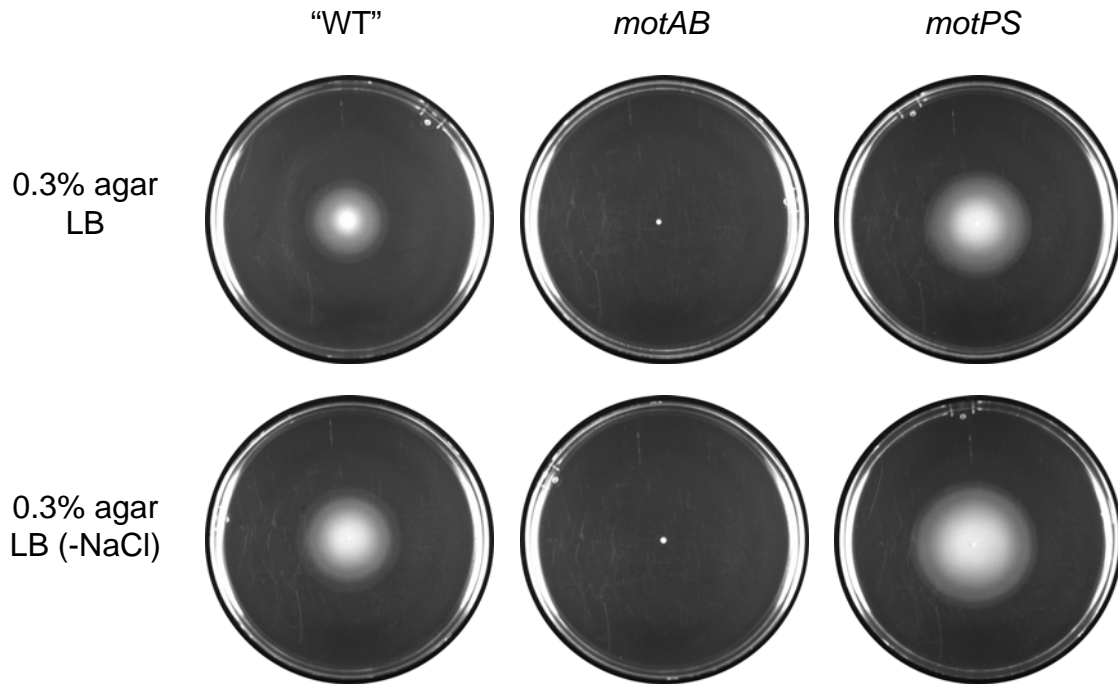

Supplement: JB.01217-13_zjb999093024so1.pdf [file JB.01217-13_zjb999093024so1.pdf]
